# Supplementary material
Source: PubMed Central journal article supplement (PMC2709959)
Supplement: NIHMS126565-supplement-Supp_Fig_Legends.pdf [file NIHMS126565-supplement-Supp_Fig_Legends.pdf]

## SUPPLEMENTAL FIGURE LEGENDS

**Figure S1. BD increases the survival of proteotoxicity models.** The life spans of the indicated strains were significantly extended on BD relative to control fed conditions. **(A)** Q<sub>35</sub>YFP animals ( $p=1.1 \times 10^{-7}$ ) **(B)** A $\beta_{42}$  animals ( $p=8.7 \times 10^{-4}$ ).

**Figure S2. Suppression of proteotoxicity by BD is not correlated with reduced aggregate formation or reduced Q<sub>35</sub>YFP protein.** Aggregates were visualized in 14 day old Q<sub>35</sub>YFP animals by fluorescence microscopy and quantified as described in the Experimental Procedures. **(A)** Control fed animals. **(B)** BD animals. **(C)** Immunoblot analysis of total protein lysates from control fed or BD animals. Equal total protein was loaded per lane and probed with anti-GFP (see Materials and Methods). The \* marks a band of unknown identity specific to the Q<sub>35</sub>YFP animals. The # marks a doublet running at the predicted size of the Q<sub>35</sub>YFP transgene.

**Figure S3. BD suppresses amyloid beta toxicity by a mechanism that is independent of IIS and dependent on *hsf-1*.** **(A)** RNAi inhibition of *daf-16* significantly accelerates paralysis in A $\beta_{42}$  animals relative to growth on empty vector (EV) bacteria in control fed (CF) animals ( $p=2.6 \times 10^{-7}$ ), but does not prevent suppression of paralysis by BD ( $p=1.7 \times 10^{-10}$ ). **(B)** RNAi inhibition of *daf-2* significantly reduces paralysis in A $\beta_{42}$  animals relative to growth on EV bacteria ( $p=5.3 \times 10^{-4}$ ). BD further reduces paralysis of *daf-2* RNAi treated animals ( $p=2.4 \times 10^{-8}$ ).

**Table S1. Life span data for supplemental figure 1A**

**Table S2. Life span data for supplemental figure 1B**

**Table S3. Life span data for figure 5B**

**Table S4. Life span data for figure 5C**

### **Supplemental Movie Files:**

**Movie 1:** Shows an 8 day old paralyzed control fed Q<sub>35</sub>YFP animal.

**Movie 2:** Shows an 8 day old BD Q<sub>35</sub>YFP animal.

**Movie 3:** Shows a 12 day old paralyzed control fed Q<sub>35</sub>YFP animal visualized by fluorescence microscopy.

**Movie 4:** Shows a 12 day old BD Q<sub>35</sub>YFP animal visualized by fluorescence microscopy.

**Movie 5:** Shows a 12 day old paralyzed control fed Q<sub>35</sub>YFP animal thrashing in a drop of M9 liquid media.

**Movie 6:** Shows a 12 day old BD Q<sub>35</sub>YFP animal thrashing in a drop of M9 liquid media.

**Movie 7.** Shows a 4 day old unc-52(e444) control fed animal paralyzed on a solid NGM surface

**Movie 8.** Shows a 4 day old unc-52(e444) BD animal paralyzed on a solid NGM surface
