# Supplementary material
Source: PubMed Central journal article supplement (PMC2709959)
Supplement: NIHMS126565-supplement-Supp_Tables.pdf [file NIHMS126565-supplement-Supp_Tables.pdf]

**Table S1**

| <b>Strain/condition</b> | <b>Mean Life Span</b> | <b>Median Life Span</b> | <b>Standard Error</b> | <b>N</b> | <b>p-value control vs. BD</b> |
|-------------------------|-----------------------|-------------------------|-----------------------|----------|-------------------------------|
| N2 CF                   | 18.5                  | 17                      | 0.5                   | 33       |                               |
| N2 BD                   | 29.0                  | 29                      | 0.8                   | 35       | 1.75867E-16                   |
| Q35YFP CF               | 19.1                  | 18                      | 0.5                   | 28       |                               |
| Q35 YFP BD              | 25.7                  | 25                      | 1.1                   | 31       | 1.61E-06                      |

**Table S2**

| <b>Strain/condition</b> | <b>Mean Life Span</b> | <b>Median Life Span</b> | <b>Standard Error</b> | <b>N</b> | <b>p-value control vs. BD</b> |
|-------------------------|-----------------------|-------------------------|-----------------------|----------|-------------------------------|
| Abeta CF                | 22.6                  | 24                      | 0.7                   | 60       |                               |
| Abeta BD                | 27                    | 29                      | 1.4                   | 53       | 8.70E-04                      |

**Table S3**

| <b>Strain/condition</b> | <b>Mean Life Span</b> | <b>Median Life Span</b> | <b>Standard Error</b> | <b>N</b> | <b>p-value control vs. BD</b> |
|-------------------------|-----------------------|-------------------------|-----------------------|----------|-------------------------------|
| EV                      | 25.2                  | 25                      | 0.7                   | 37       |                               |
| EV + BD                 | 38.9                  | 40                      | 1                     | 49       | <1E-5                         |
| hsf-1                   | 13.3                  | 13                      | 0.4                   | 49       |                               |
| hsf-1 + BD              | 12.9                  | 13                      | 0.4                   | 61       | 0.72                          |

**Table S4**

| <b>Strain/condition</b> | <b>Mean Life Span</b> | <b>Median Life Span</b> | <b>Standard Error</b> | <b>N</b> | <b>p-value control vs. BD</b> |
|-------------------------|-----------------------|-------------------------|-----------------------|----------|-------------------------------|
| N2 CF                   | 25.9                  | 24                      | 0.6                   | 101      |                               |
| N2 BD                   | 37.1                  | 38                      | 0.8                   | 114      | < 1E-5                        |
| hsf-1 CF                | 20.9                  | 21                      | 0.7                   | 112      |                               |
| hsf-1 BD                | 23                    | 21                      | 0.8                   | 159      | 0.72                          |
| daf-16 CF               | 20.2                  | 20                      | 0.6                   | 83       |                               |
| daf-16 BD               | 29.1                  | 30                      | 0.6                   | 125      | < 1E-5                        |
