# Supplementary material
Source: PubMed Central journal article supplement (PMC2709959)

# Figure S1

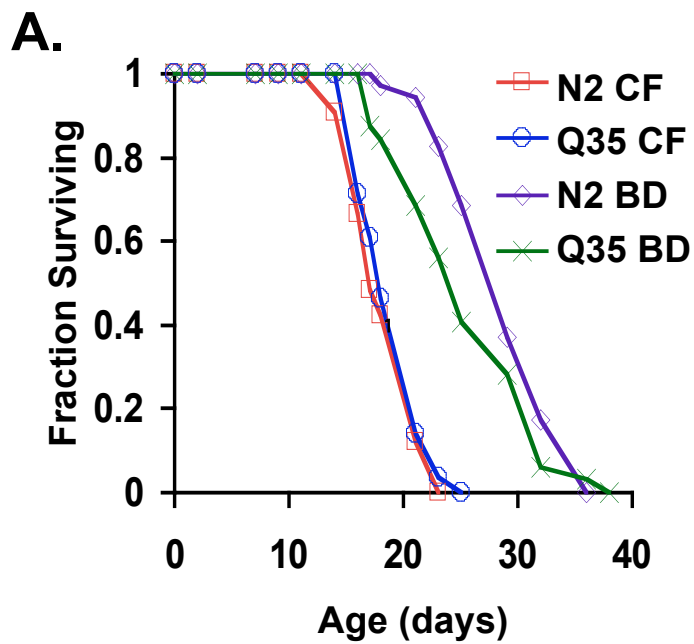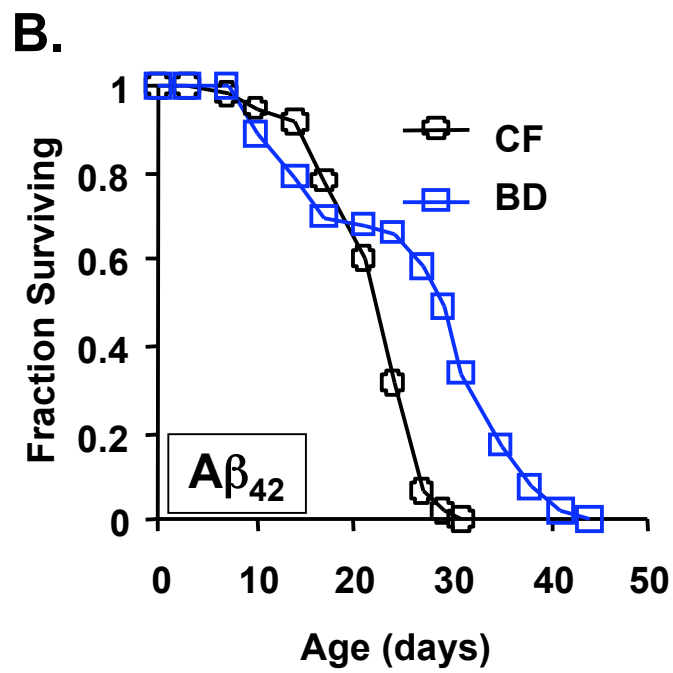

# Figure S2

A.

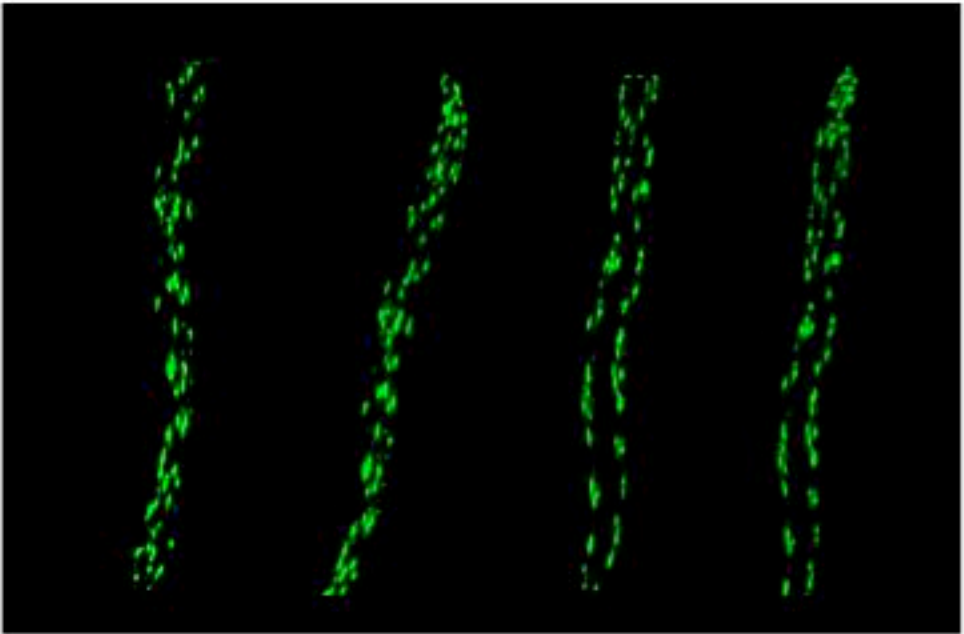

CF

B.

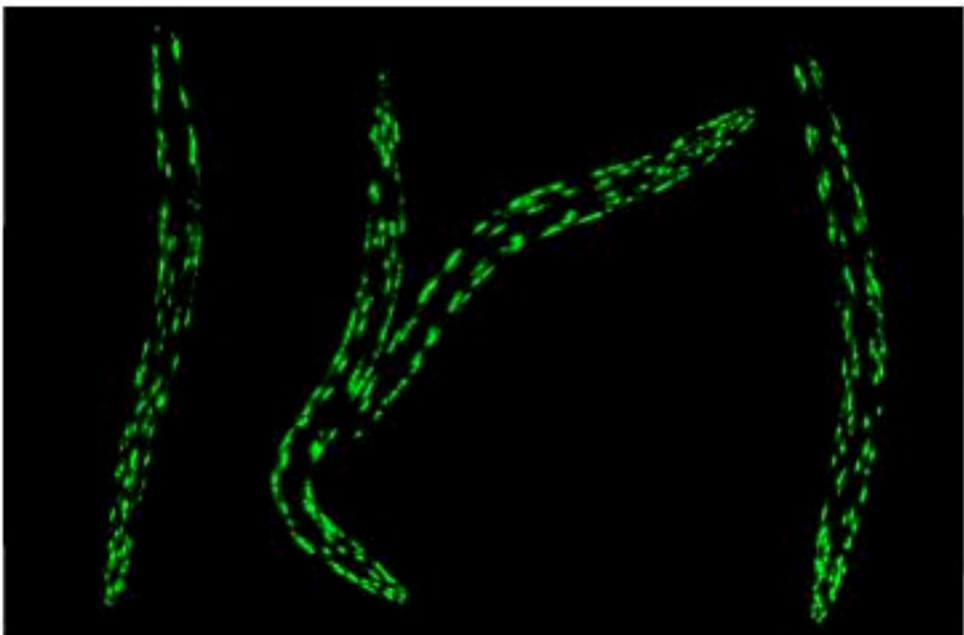

BD

C.

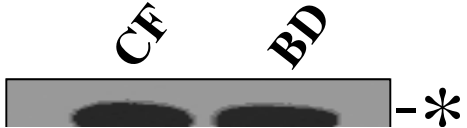

Figure S3

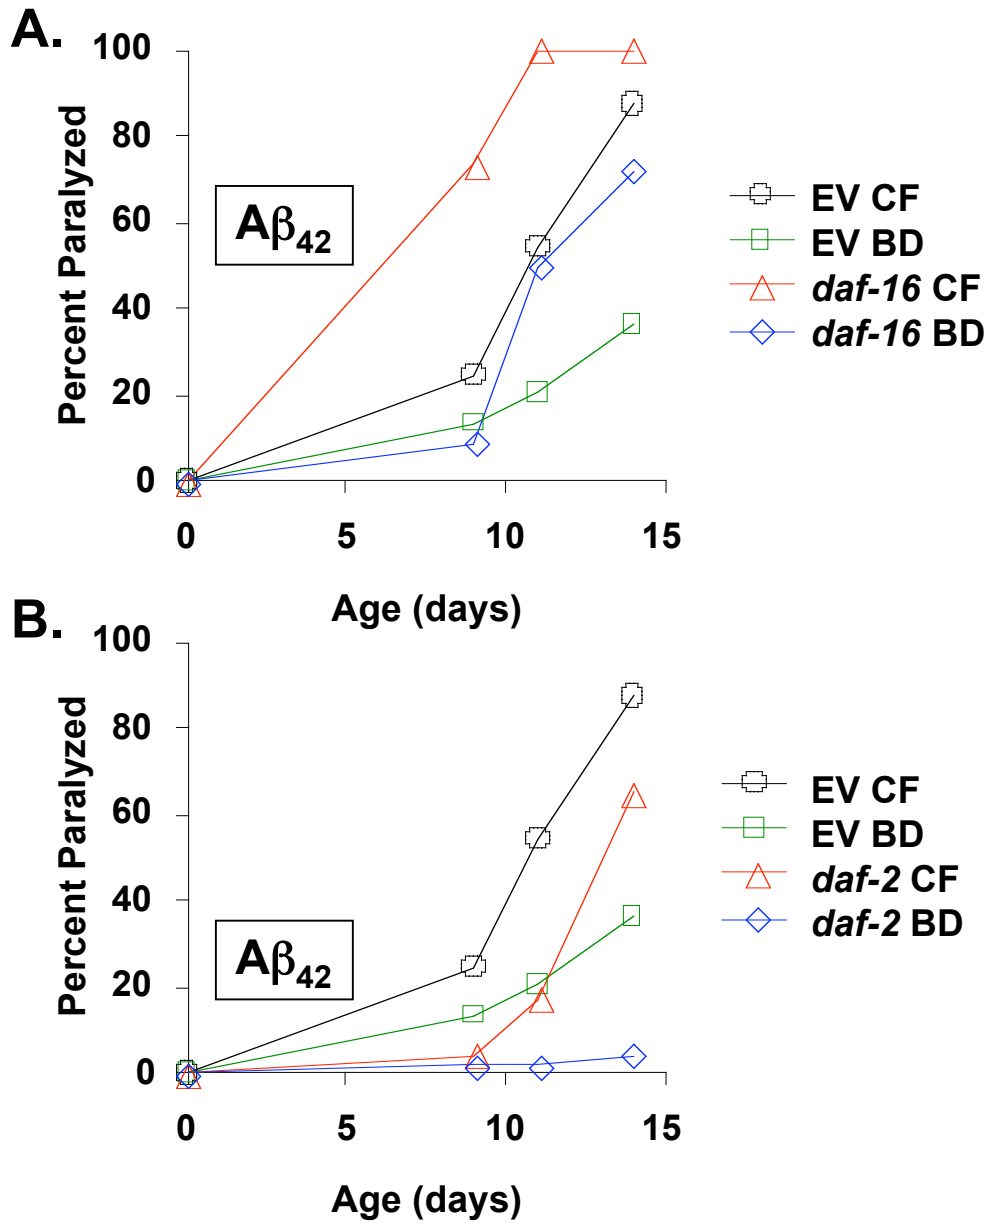

Supplement: NIHMS126565-supplement-Supp_Figures.pdf [file NIHMS126565-supplement-Supp_Figures.pdf]
